# Supplementary material for: Projecting the Impact of Climate Change on Runoff in the Tarim River Simulated by the Soil and Water Assessment Tool Glacier Model
Source: MDPI journal article supplement (doi:10.3390/rs15163922), 2023-08-08
Supplement: s1 [file s1]

# Supplementary information for

## Projecting the Impact of Climate Change on Runoff in the Tarim River Simulated by the Soil and Water Assessment Tool Glacier Model

Gonghuan Fang<sup>1,3</sup>, Zhi Li<sup>1\*</sup>, Yaning Chen<sup>1\*</sup>, Wenting Liang<sup>1,4</sup>, Xueqi Zhang<sup>1</sup>, Qifei Zhang<sup>2</sup>

**Table S1.** Model parameter set in the SWAT-Glacier model in the headwaters of the Tarim River

|                | Kaidu<br>R | Kumaric<br>R | Toxkan<br>R. | Yarkant<br>R. | Tizinafu<br>R. | Kalakash<br>R | Yulongkash<br>R |
|----------------|------------|--------------|--------------|---------------|----------------|---------------|-----------------|
| r_CN2.mgt      | -0.23      |              | -0.3         | 0.28          | -0.23          | -0.03         | -0.01           |
| r_sol_awc.sol  | 0.15       | 0.08         | -0.1         |               | 0.07           | -0.24         | 0.22            |
| r_sol_k.sol    | -0.06      | -0.08        | 0.3          | -0.12         | 0.19           | -0.01         | -0.16           |
| v_ALPHA_BF.gw  | 0.11       | 0.97         | 0.98         | 0.47          | 0.11           | 0.59          | 0.99            |
| v_Ch_K1.sub    | 0.04       | 0.01         | 63.1         | 169.77        | 205.46         | 211.41        | 67.91           |
| v_Ch_K2.rte    | 440.54     | 0.21         | 421.37       | 54.42         | 20.26          | 36.86         | 22.88           |
| v_GLA_TIMP.bsn | 0.19       | 0.07         | 0.82         | 0.02          | 0.9            | 0.68          | 0.01            |
| v_gmfmn.bsn    | 4.1        | 1.34         | 2.6          | 3.48          | 0.26           | 4.55          | 1.88            |
| v_gmfmx.bsn    | 4.51       | 4            | 4.29         | 4.17          | 4.25           | 8.64          | 4.11            |
| v_gmtmp.bsn    | 2.07       | -3.84        | 1.59         | -1.16         | -3.38          | -4.99         | -1.09           |
| v_gw_delay.gw  | 0.88       | 0.02         | 0.18         | 0.02          | 0.12           | 0.1           | 0.02            |
| v_Plaps.sub    | 200        | 198.8        | 169.4        | 107.08        | 158.02         | 143.97        | 93.74           |
| v_Revapmn.gw   | 246.08     | 340.88       | 13.05        | 207.72        | 144.56         | 277.31        | 104.15          |
| v_SFTMP.bsn    | -3.82      | -4.64        | -2.84        | -3.3          | 0.32           | 1.88          | 2.69            |
| v_SMFMN.bsn    | 1.46       | 5.68         | 2.94         | 5.24          | 2.43           | 2.54          | 2.67            |
| v_SMFMX.bsn    | 9.41       | 5.62         | 9.27         | 4.01          | 6.16           | 6.73          | 4.04            |
| v_SMTMP.bsn    | 1.46       | -1.39        | -4.89        | 0.75          | 2.16           | -0.37         | -1.44           |
| v_SNOCOVMX.bsn | 188.78     | 185.04       | 0.71         | 498.53        | 499.14         | 31.15         | 498.89          |
| v_surlag.bsn   | 22.09      | 0.22         | 2.41         | 0.03          | 23.68          | 0.13          | 0.7             |
| v_TIMP.bsn     | 0.63       | 0.04         | 0.15         | 1             | 0.83           | 0.98          | 0.03            |
| v_Tlaps.sub    | -7.85      | -9.57        | -9.32        | -7.32         | -8.06          | -7.72         | -6.28           |
